# Supplementary material for: A facile fluorescence Eu MOF sensor for ascorbic acid and ascorbate oxidase detection
Source: Royal Society of Chemistry journal article supplement (doi:10.1039/d3ay01978k), 2023-12-22
Supplement: d3ay01978k1.pdf [file d3ay01978k1.pdf]

Electronic Supplementary Material (ESI) for Analytical Methods

This journal is © The Royal Society of Chemistry 2013

## Supporting Information

### **A facile fluorescence Eu MOF sensor for ascorbic acid and ascorbate oxidase detection**

**Xin-Xin Dong<sup>a</sup>, Tao-Li Chen<sup>a</sup>, Xiang-Juan Kong<sup>\*,a</sup>, Shuang Wu<sup>\*,b</sup>, Fang-Fang Kong<sup>a</sup>, Qiang Xiao<sup>\*,a</sup>**

<sup>a</sup> *Jiangxi Key Laboratory of Organic Chemistry, Jiangxi Science and Technology Normal University, Nanchang 330013, P. R. China*

<sup>b</sup> *A Key Laboratory of Jiangxi Province for Persistent Pollutants Control and Resources Recycle, Nanchang Hangkong University, Nanchang 330063, P. R. China*

<sup>\*</sup> Corresponding authors

*E-mail:* xiangjuankong@163.com; shuang\_wu@nchu.edu.cn;

xiaoqiang@tsinghua.org.cn

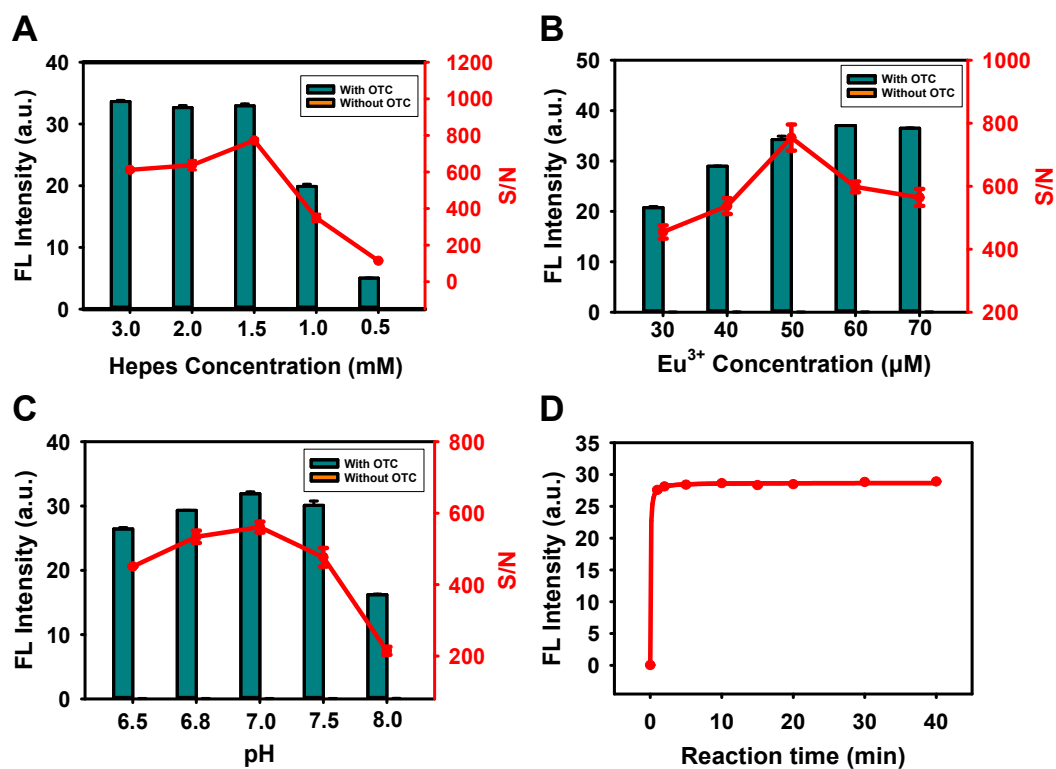

**Fig. S1** Optimization of Eu MOF synthesis. The effect of the Hepes concentration(A),  $\text{Eu}^{3+}$  concentration (B), the solution pH (C) and reaction time (D) on the emission intensity of Eu MOF. Error bars represent the standard deviation of three experiments. The conditions of 1.5 mM Hepes, 50  $\mu\text{M}$   $\text{Eu}^{3+}$  concentration, the pH of 7.0 and the reaction time of 2 min were selected.

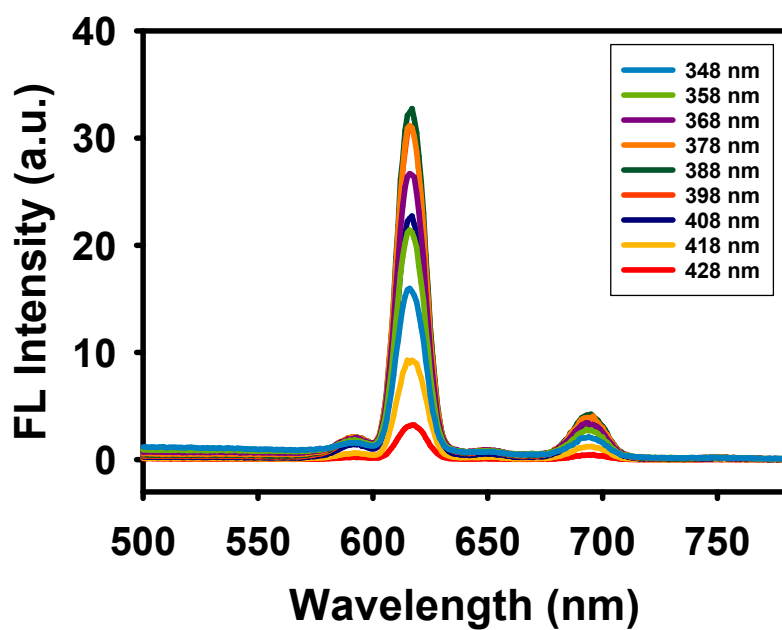

**Fig. S2** Fluorescence emission spectra of Eu MOF with different excitation wavelengths.

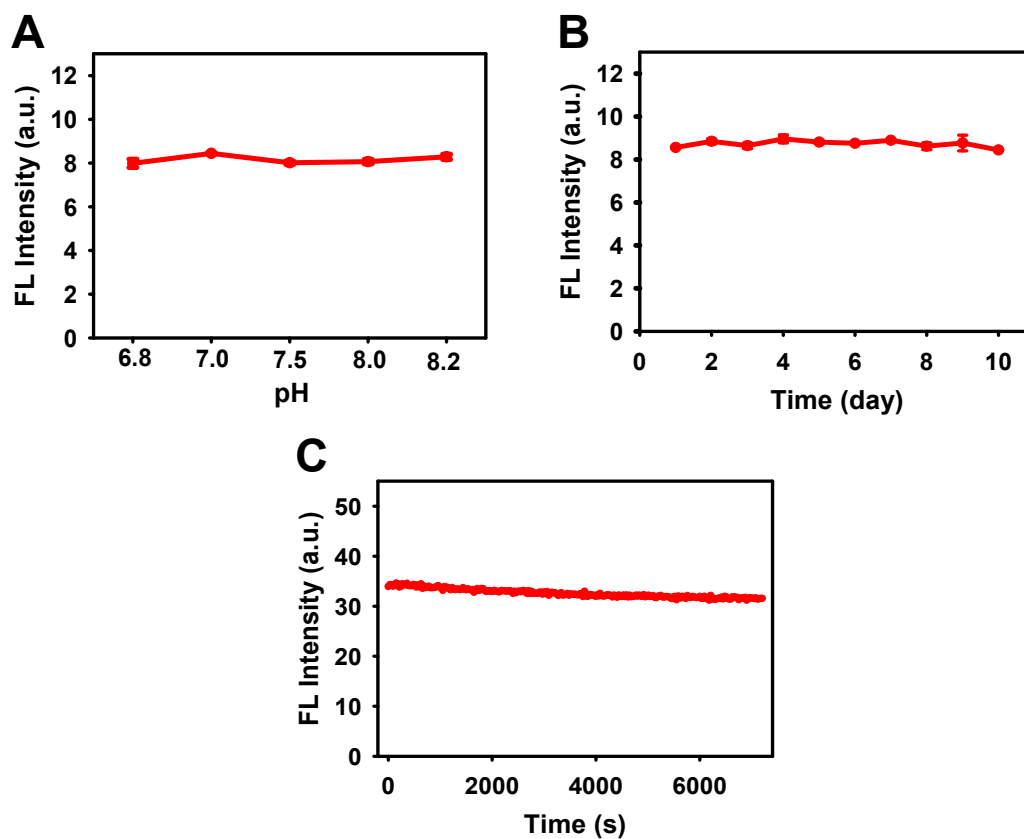

**Fig. S3** The stability of Eu MOF under (A) different pH, (B) different days and (C) under continuous irradiation with 388 nm excitation light.

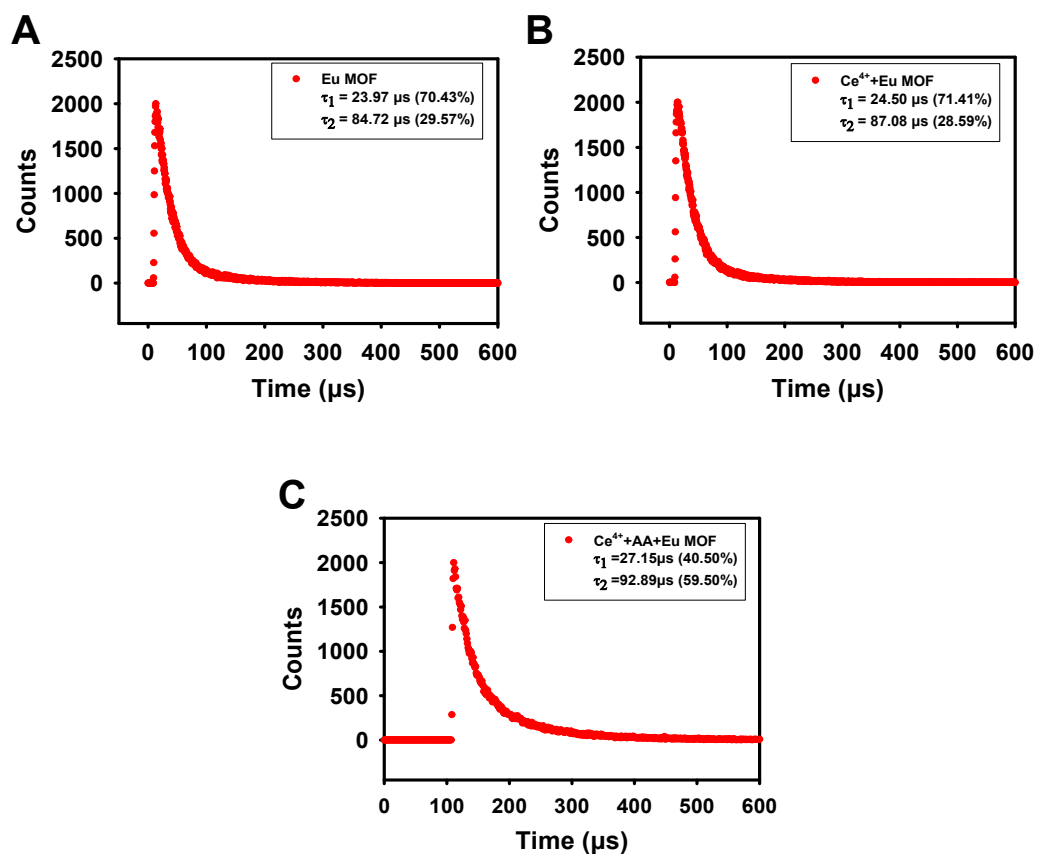

**Fig. S4** Fluorescence lifetime of Eu MOF (A),  $\text{Ce}^{4+}$ +Eu MOF (B) and  $\text{Ce}^{4+}$ +AA+Eu MOF (C) by monitoring the emission at 615 nm ( $\lambda_{\text{ex}} = 388 \text{ nm}$ ).

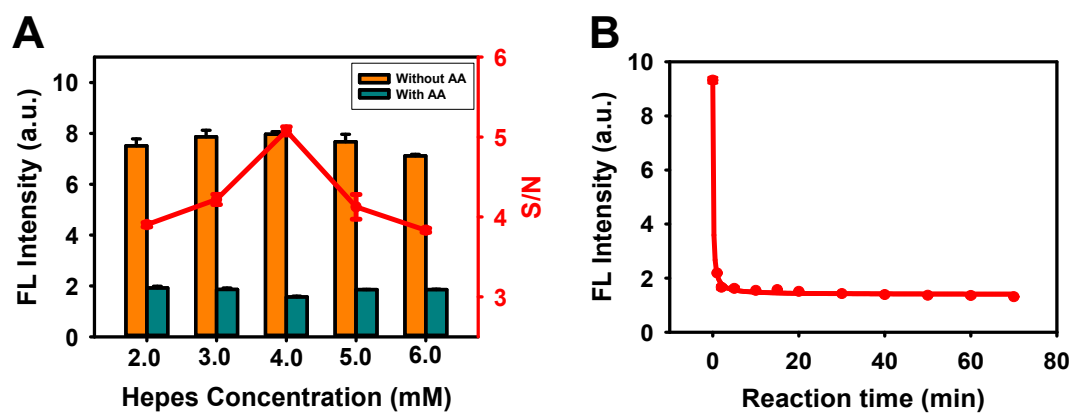

**Fig. S5** Effects of (A) Hepes concentration, (B) reaction time on the fluorescence intensity of Eu MOF for AA sensing.

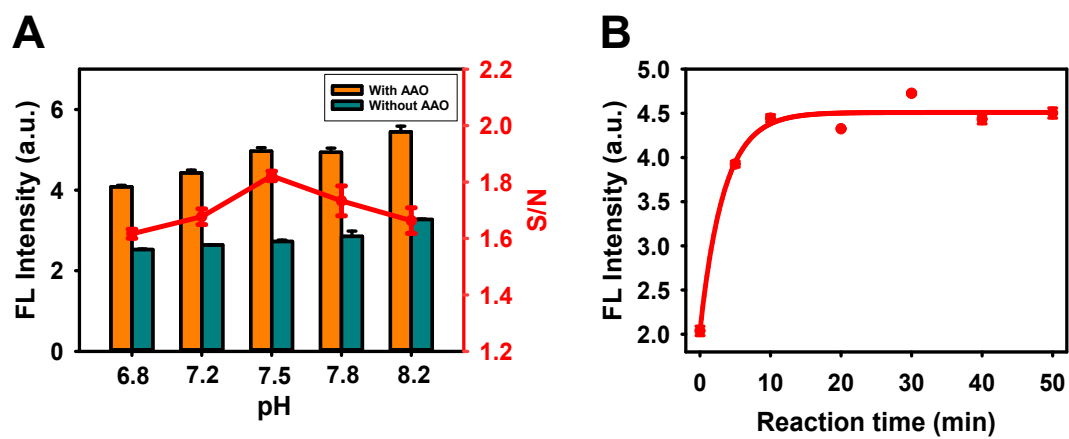

**Fig. S6** Effects of (A) pH, (B) reaction time of AAO-regulated enzymic catalytic oxidation of AA on the fluorescence intensity of Eu MOF for AAO sensing.

**Table S1.** Comparison of different methods for the detection of AA

| Detection method | System                             | Linear range( $\mu\text{M}$ ) | LOD ( $\mu\text{M}$ ) | References |
|------------------|------------------------------------|-------------------------------|-----------------------|------------|
| Fluorescence     | SQD/Cr (VI)                        | 10-5500                       | 3.00                  | S1         |
| Fluorescence     | PDA NPs                            | 0-30                          | 0.40                  | S2         |
| Fluorescence     | LDH-GQDs                           | 5-300                         | 1.72                  | S3         |
| Fluorescence     | N, S-co-CDs                        | 0-150                         | 2.31                  | S4         |
| Fluorescence     | IrO <sub>2</sub> /MnO <sub>2</sub> | 0–312.5                       | 1.23                  | S5         |
| Fluorescence     | Eu MOF                             | 0-3.0                         | 0.32                  | This work  |



**Table S2.** Comparison of different methods for the determination of AAO.

| Detection method | System                  | Linear range(U/L) | LOD (U/L) | References |
|------------------|-------------------------|-------------------|-----------|------------|
| Colorimetry      | DNA-Au/Ag NC            | 10-200            | 6.8       | S6         |
| Fluorescence     | Mn@ZnGe NPs             | 1250-2500         | 728       | S7         |
| Fluorescence     | Papain-capped Au/Ag NCs | 5-80              | 1.72      | S8         |
| Fluorescence     | Eu MOF                  | 0-50.0            | 1.18      | This work  |

**Table S3.** Analytical results of AA in diluted human serum samples (0.2%)

| Sample | Added ( $\mu\text{M}$ ) | Found ( $\mu\text{M}$ ) | Recovery | RSD (n=3) |
|--------|-------------------------|-------------------------|----------|-----------|
| 1      | 1.0                     | 0.97                    | 97.28%   | 3.64%     |
| 2      | 2.0                     | 1.93                    | 96.30%   | 3.26%     |
| 3      | 3.0                     | 2.81                    | 93.66%   | 2.48%     |

**Table S4.** Analytical results of AA in orange juice samples (0.1%)

| Sample | Added ( $\mu\text{M}$ ) | Found ( $\mu\text{M}$ ) | Recovery | RSD (n=3) |
|--------|-------------------------|-------------------------|----------|-----------|
| 1      | 0.0                     | 0.74                    |          |           |
| 2      | 1.0                     | 1.01                    | 100.50%  | 3.96%     |
| 3      | 2.0                     | 2.09                    | 104.31%  | 6.26%     |
| 4      | 3.0                     | 2.79                    | 93.01%   | 7.51%     |

**Table S5** AAO detection in diluted human serum samples (0.02%).

| Sample | Added (U/L) | Found (U/L) | Recovery | RSD (n=3) |
|--------|-------------|-------------|----------|-----------|
| 1      | 10.0        | 9.75        | 97.54%   | 1.73%     |
| 2      | 20.0        | 20.53       | 102.66%  | 4.00%     |
| 3      | 30.0        | 28.43       | 94.76%   | 3.46%     |
| 4      | 40.0        | 40.42       | 101.04%  | 2.55%     |

References:

- S1. M. K. Xia, H. Mei, Q. H. Qian, R. Dahlgren, M. Gao and X. D. Wang, *RSC Adv.*, 2021, **11**, 10572-10581.
- S2. Y. X. Yang, Y. Z. Fang, J. X. Tian, Q. Xiao, X. J. Kong, *RSC Adv.*, 2020, **10**, 28164-28170.
- S3. H. Shi, L. G. Chen, N. Niu, *Sens. Actuators B Chem.*, 2021, **345**, 130353.
- S4. S. F. Xu, S. Q. Ye, Y. H. Xu, F. F. Liu, Y. S. Zhou, Q. Yang, H. L Peng, H. Xiong, and Z. Zhang, *Anal. Sci.*, 2020, **36**, 353–360.
- S5. Y. Y. Zhong, Q. L. Li, M. L. Lu, T. T. Wang, H. Y. Yang, Q. Y. He, X. P. Cui, X. G. Li and S. Q. Zhao, *Microchim. Acta.*, 2020, **187**, 675.
- S6. S. Liu, S. Pang, *Microchim. Acta.*, 2018, **185**, 426.
- S7. X. Y. Han, Z. H. Chen, Q. X. Fan, K. N. Li, F. Y. Mu, Q. Luo, *Microchim. Acta.*, 2019, **186**, 466.
- S8. M. J. Wang, M. K. Wang, G. N. Wang, X. G. Su, *Analyst*, 2020,**145**, 1001-1007.
